# Supplementary material for: Activation of oxygen-responsive pathways are associated with altered protein metabolism in Arctic char exposed to hypoxia
Source: Oxford University Press journal article supplement (doi:10.1242/jeb.203901), 2019-01-01
Supplement: jeb203901supp.pdf [file jeb203901supp.pdf]

## Supplementary information

Table S1. Primer sequences and efficiency (E) in Arctic char skeletal muscle, liver and heart.

| Primer                       |     | Sequence                     | Acc. No.       | BP  | Muscle<br>E (%) | Liver<br>E (%) | Heart<br>E (%) |
|------------------------------|-----|------------------------------|----------------|-----|-----------------|----------------|----------------|
| ATF4                         | Fwd | 5'-AGATGGCACAGAACAAGACG-3'   | NM_001140101.1 | 143 | 104             | 95             | 102            |
|                              | Rev | 5'-GAGTCTGCTTTCTCCGCAAG-3'   |                |     |                 |                |                |
| ATG5                         | Fwd | 5'-AGAGCGTGACTTGCTCCACT-3'   | NM_001173812.1 | 109 | 97              | 99             | 110            |
|                              | Rev | 5'-GTCGTTGATGACCTGGCTCT-3'   |                |     |                 |                |                |
| ATG4                         | Fwd | 5'-TTGAAGACTTGCCTGACACC-3'   | NM_001141602.2 | 98  | 107             | 104            | 99             |
|                              | Rev | 5'-CGAGTGAACGTCTGATAGGAGT-3' |                |     |                 |                |                |
| $\alpha$ -tubulin            | Fwd | 5'-CTGACTGTGCCTTCATGGTG-3'   | NM_001141467.2 | 119 | 99              | 103            | 99             |
|                              | Rev | 5'-GGAGGAGACGATCTGACCAA-3'   |                |     |                 |                |                |
| $\beta$ -actin               | Fwd | 5'-GACGCGACCTCACAGACTAC-3'   | NM_001123525.1 | 79  | 105             | 98             | 109            |
|                              | Rev | 5'-GTGCCCATCTCCTGCTCAAA-3'   |                |     |                 |                |                |
| Beclin1                      | Fwd | 5'-GCCTGAAGAAGACCAACGTC-3'   | NM_001139818.1 | 86  | 107             | 105            | ----           |
|                              | Rev | 5'-GCCCAGACGGAAGTTATTGA-3'   |                |     |                 |                |                |
| Beclin1                      | Fwd | 5'-GTGTGCAGCAGTTCAAGGAG-3'   | NM_001139818.1 | 103 | ----            | ----           | 97             |
|                              | Rev | 5'-CTGCCTCCTGTGTCCTCAAT-3'   |                |     |                 |                |                |
| Calpastatin                  | Fwd | 5'-GCAAGCTGACAGAGATGGAAG-3'  | NM_001173691.1 | 70  | 97              | 99             | ----           |
|                              | Rev | 5'-AACCTGTACTCTGGTGGGAGA-3'  |                |     |                 |                |                |
| Calpastatin                  | Fwd | 5'-GCCGTCAAATCTGCTGCTAA-3'   | NM_001173691.1 | 100 | ----            | ----           | 100            |
|                              | Rev | 5'-GCTCTGGGATAGGAGTCATGT-3'  |                |     |                 |                |                |
| Calpain 7                    | Fwd | 5'-AACAACCCTCAGTACCGGCT-3'   | NM_001173603.1 | 100 | ----            | 109            | ----           |
|                              | Rev | 5'-GTGCAAAGTCATCCTTGTCAGT-3' |                |     |                 |                |                |
| Calpain 7                    | Fwd | 5'-TTGCCTTTCCTGTCCATTC-3'    | NM_001173603.1 | 119 | 105             | ----           | 108            |
|                              | Rev | 5'-GATCATGGTGGGTTATTGC-3'    |                |     |                 |                |                |
| Calpain<br>small<br>subunit1 | Fwd | 5'-TGGAGATGACATGGAGGTGA-3'   | NM_001173560.1 | 99  | 107             | 106            | 110            |
|                              | Rev | 5'-TCAATGCTAAACCCGTCTGTC-3'  |                |     |                 |                |                |
| Cathepsin<br>D               | Fwd | 5'-ATCTGCCTGAGTGGCTTCAT-3'   | NM_001124711.1 | 124 | 103             | 102            | 105            |
|                              | Rev | 5'-GTTGTCACGGTCAACACAG-3'    |                |     |                 |                |                |
| Cathepsin<br>L               | Fwd | 5'-GTCAAGGACCAGGGATCATGT-3'  | NM_001146546.1 | 120 | 101             | 97             | 103            |
|                              | Rev | 5'-GTCCACCAGGTTCTGTTTAC-3'   |                |     |                 |                |                |
| DDIT3                        | Fwd | 5'-GCGAAGAAGAGCAGGAGAGA-3'   | XM_020482828.1 | 73  | 105             | 101            | 117            |
|                              | Rev | 5'-TCTCGTTCTGGTCCGTCAG-3'    |                |     |                 |                |                |
| E1F- $\alpha$                | Fwd | 5'-AAGGAGGTCAGCACCTACATC-3'  | NC_027313.1    | 73  | 97              | 100            | 104            |
|                              | Rev | 5'-ATCCAGAGATGGGCACAAAG-3'   |                |     |                 |                |                |

**Table S1 (continued). Primer sequences and efficiency (E) in Arctic char skeletal muscle, liver and heart**

| Primer        | Sequence                              | Acc. No.    | BP  | Muscle E (%) | Liver E (%) | Heart E (%) |
|---------------|---------------------------------------|-------------|-----|--------------|-------------|-------------|
| eif2 $\alpha$ | Fwd 5'-AGATGGAGGTGTGGGATGTC-3'        | NM_00114008 | 142 | 95           | 99          | 107         |
|               | Rev 5'-TAGCCGTTGCTGACACGTAG-3'        | 8.1         |     |              |             |             |
| Fbxo25        | Fwd 5'-CCAGCTCATAGCCAGGTCTC-3'        | NM_00113989 | 103 | 95           | 108         | 97          |
|               | Rev 5'-ATGGTCCTCCAGAACCTTCC-3'        | 7.1         |     |              |             |             |
| GAPDH         | Fwd 5'-AACATCATCCCAGCCTCCAC-3'        | NM_00112356 | 147 | 104          | 107         | -----       |
|               | Rev 5'-GGCAGGTTTCTCAAGACGGA-3'        | 1.1         |     |              |             |             |
| HIF1a         | Fwd 5'-AGCCTGCACATCCTTCTGTC-3'        | NM_00114002 | 136 | 100          | -----       | 98          |
|               | Rev 5'-CAGCCTCTGGTTGAGAGGTC-3'        | 2.1         |     |              |             |             |
| HIF1a         | Fwd 5'-CCGTTTCTGGCTAAGAGTG-3'         | NM_00114002 | 89  | -----        | 97          | -----       |
|               | Rev 5'-CAGCCTCTGGTTGAGAGGTC-3'        | 2.1         |     |              |             |             |
| LC3A          | Fwd 5'-GCCTTCTTCTCCTGGTCA-3'          | NM_00113958 | 119 | 101          | 105         | 106         |
|               | Rev 5'-TCCTGAGAGGCGTAAACCAT-3'        | 9.1         |     |              |             |             |
| LC3B          | Fwd 5'-CAAGTTCTGGTTCTGACC-3'          | NM_00125235 | 131 |              | 105         | 109         |
|               | Rev 5'-CTGCCGACACTGAGACCAT-3'         | 6.1         |     |              |             |             |
| Mafbx         | Fwd 5'-AGTACCACTTCACTGACAGACA-3'      | NM_00118502 | 78  | 100          | 101         | 103         |
|               | Rev 5'-ACATCTTCTTCCACTCCAAGTG-3'      | 7.1         |     |              |             |             |
| Murfl         | Fwd 5'-CTCCATGTGCAAAGTGTCG-3'         | NM_00127912 | 155 | 102          | -----       | -----       |
|               | Stem 5'-TGTCTCCATCTGAGCCATC-3'        | 2.1         |     |              |             |             |
| rs11          | Fwd 5'-ATGTCGGTCCATCTCTCACC-3'        | NM_00112353 | 144 | 102          | 106         | 105         |
|               | Stem 5'-GAACTGCTTCTTGGCTCCAG-3'       | 8.1         |     |              |             |             |
| UBE2H         | Fwd 5'-ACAGCCCTTACGATCTCACCAAT-3'     | NM_00116535 | 155 | 104          | -----       | 109         |
|               | Stem 5'-TTCTGGATGTACTCTTTGATTTTCTG-3' |             |     |              |             |             |
| VEGFa         | Fwd 5'-GCCTTGCTCAGAGAGAAGAAAG-3'      | XM_01416915 | 139 | 102          | -----       | 115         |
|               | Stem 5'-CCTTGGTTTGTACACATCTGC-3'      | 7.1         |     |              |             |             |
| VEGFa         | Fwd 5'-GAGCCTTGCTCAGAGAGAAGA-3'       | XM_01416915 | 139 | -----        | 98          | -----       |
|               | Stem 5'-CCTTGGTTTGTACACATCTGC-3'      | 7.1         |     |              |             |             |
| VHL           | Fwd 5'-CGAATCATGCGACCAGTATG-3'        | XM_02156926 | 195 | 102          | 101         | 98          |
|               | Stem 5'-AGCCTGTCCATTCTCCATTG-3'       | 2.1         |     |              |             |             |

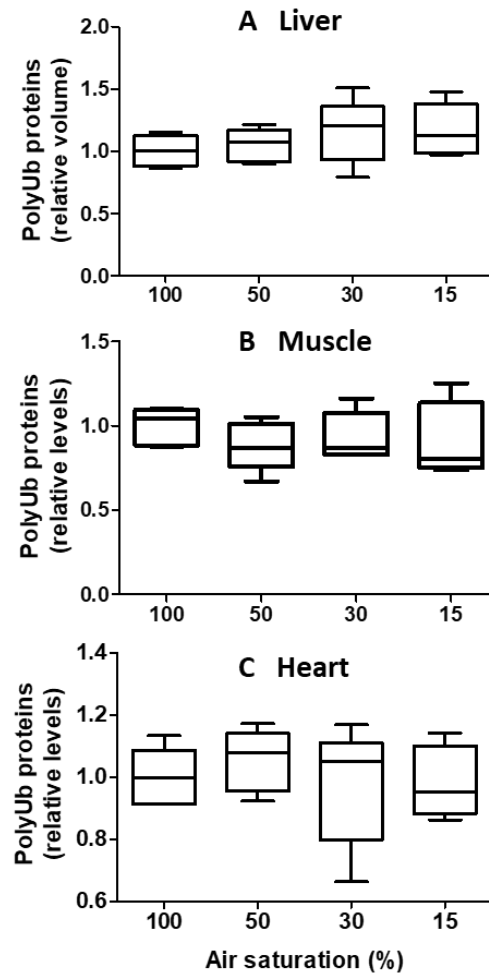

**Figure S1. Polyubiquitinated proteins (relative band densities) in A) liver, B) muscle and C) heart of hypoxic Arctic char.** Data are normalized to control levels and values are expressed as mean  $\pm$  s.e.m.
